# Supplementary material for: Highly efficient electrochemical recognition and quantification of amine enantiomers based on a guest-free homochiral MOF
Source: Royal Society of Chemistry journal article supplement (doi:10.1039/c7ra00205j), 2017-01-01
Supplement: c7ra00205j2.pdf [file c7ra00205j2.pdf]

## Electronic Supplementary Information

# **Highly efficient electrochemical recognition and quantification of amine enantiomers based on a guest-free homochiral MOF**

Rui Kuang, Luyi Zheng, Yanhui Chi, Jingmin Shi\*, Xuexue Chen, Chengcheng Zhang

College of Chemistry, Chemical Engineering and Materials Science, Shandong Normal University,  
Jinan 250014, P. R. China.

E-mail: shijingmin1955@gmail.com

## **S1. Reagents and materials**

Enantiomers R(+)/S(-)- $\alpha$ -methylbenzylamine (99%) were purchased from Aladdin (Aladdin Chemistry Co. Ltd., Shanghai, China). L-leucine, salicylaldehyde and other chemicals were purchased from Sinopharm (Sinopharm Chemical Reagent Co., Ltd, Beijing, China). All chemicals are of analytical reagents grade and used as received without further purification. Ultrapure water (18.2 M $\Omega$  cm) was obtained from a Water Pro water purification system (Labconco Corporation, Kansas City, MO) and used throughout the experiments.

## **S2. Instruments and characterization**

Elemental analyses (C, H, N) were achieved on a Perkin-Elmer Model 2400 analyzer. Scanning Electron Microscopy (SEM) images were obtained from an FEI Quanta FEG250 Scanning Electron Microscope (America). Thermogravimetric (TG) analyses were carried out under flowing nitrogen at a heating rate of 10 °C·min<sup>-1</sup> on a STA449C integration thermal analyzer. Powder X-ray Diffraction (PXRD) data were collected at room temperature (298 K) on a D8 FOCUS Powder X-ray Diffractometer (Germany, BRUKER AXS GMBH). The solid state CD spectra were obtained using a J-815 spectropolarimeter (Jasco, Japan). The Brunauer-Emmett-Teller (BET) surface area analysis was performed on an ASAP 2020/TriStar 3000 (Micromeritics) using nitrogen adsorption at 77 K. All electrochemical measurements were performed on a CHI760D electrochemical workstation (Shanghai CH Instruments Co., China).

## **S3. Single crystal X-ray structure determination**

Single crystal data collection for (Cu<sub>4</sub>L<sub>4</sub>)<sub>n</sub> was made on an Oxford Diffraction Gemini E (Enhance Cu X-Ray source, K $\alpha$ ,  $\lambda$  = 1.54184 Å) equipped with a graphite monochromator and ATLAS CCD detector (CrysAlis CCD, Oxford Diffraction Ltd) at room temperature (298K). The structure was solved with the XSS4 structure solution program using Direct Methods and refined with the XL refinement package using Least Squares minimisation. All non-hydrogen atoms were refined with anisotropic thermal parameters, and all hydrogen atoms were included in calculated positions and refined with isotropic thermal parameters riding on those of the parent atoms. Parameters for data collection and refinement are summarized in Table S1. Selected bond lengths and angles are given in Table S2.

**Table S1 Phase data for (Cu<sub>4</sub>L<sub>4</sub>)<sub>n</sub>**

|                    |                                                                                                                          |
|--------------------|--------------------------------------------------------------------------------------------------------------------------|
| <b>Space-group</b> | <i>P</i> 1 (1) - triclinic                                                                                               |
| <b>Cell</b>        | a=8.5213(3) Å b=12.9489(4) Å c=13.3149(5) Å α=68.372(3)° β=82.029(4)°<br>γ=89.978(4)°<br>V=1350.50(9) Å <sup>3</sup> Z=1 |

**Table S2 Atomic parameters for (Cu<sub>4</sub>L<sub>4</sub>)<sub>n</sub>**

| Atom | Ox. | Wyck. | Site | S.O.F. | x/a        | y/b        | z/c        | U [Å <sup>2</sup> ] |
|------|-----|-------|------|--------|------------|------------|------------|---------------------|
| C1   |     | 1a    | 1    | 1      | 1.0297(10) | 0.1479(7)  | 0.5509(7)  |                     |
| C2   |     | 1a    | 1    | 1      | 1.0674(10) | 0.0684(8)  | 0.5041(7)  |                     |
| H2   |     | 1a    | 1    | 1      | 1.06800    | -0.00650   | 0.54800    | 0.0500              |
| C3   |     | 1a    | 1    | 1      | 1.1033(15) | 0.1026(10) | 0.3929(9)  |                     |
| H3   |     | 1a    | 1    | 1      | 1.13210    | 0.05080    | 0.36130    | 0.0810              |
| C4   |     | 1a    | 1    | 1      | 1.0973(17) | 0.2149(11) | 0.3260(9)  |                     |
| H4   |     | 1a    | 1    | 1      | 1.12230    | 0.23850    | 0.25040    | 0.0910              |
| C5   |     | 1a    | 1    | 1      | 1.0550(14) | 0.2862(10) | 0.3733(8)  |                     |
| H5   |     | 1a    | 1    | 1      | 1.04890    | 0.36030    | 0.32840    | 0.0700              |
| C6   |     | 1a    | 1    | 1      | 1.0199(10) | 0.2590(7)  | 0.4830(6)  |                     |
| C7   |     | 1a    | 1    | 1      | 0.9551(10) | 0.3420(7)  | 0.5286(7)  |                     |
| H7A  |     | 1a    | 1    | 1      | 0.84330    | 0.32210    | 0.55580    | 0.0460              |
| H7B  |     | 1a    | 1    | 1      | 0.96250    | 0.41390    | 0.46920    | 0.0460              |
| C8   |     | 1a    | 1    | 1      | 1.1736(10) | 0.4319(7)  | 0.5823(6)  |                     |
| H8   |     | 1a    | 1    | 1      | 1.23290    | 0.42380    | 0.51740    | 0.0430              |
| C9   |     | 1a    | 1    | 1      | 1.1288(11) | 0.5530(7)  | 0.5502(8)  |                     |
| H9A  |     | 1a    | 1    | 1      | 1.09240    | 0.56570    | 0.61680    | 0.0520              |
| H9B  |     | 1a    | 1    | 1      | 1.03940    | 0.56230    | 0.51040    | 0.0520              |
| C10  |     | 1a    | 1    | 1      | 1.2566(12) | 0.6443(8)  | 0.4811(9)  |                     |
| H10  |     | 1a    | 1    | 1      | 1.35230    | 0.62920    | 0.51620    | 0.0760              |
| C11  |     | 1a    | 1    | 1      | 1.299(2)   | 0.6413(13) | 0.3645(11) |                     |
| H11A |     | 1a    | 1    | 1      | 1.20330    | 0.64330    | 0.33320    | 0.1690              |
| H11B |     | 1a    | 1    | 1      | 1.35060    | 0.57410    | 0.36930    | 0.1690              |
| H11C |     | 1a    | 1    | 1      | 1.36830    | 0.70440    | 0.31920    | 0.1690              |
| C12  |     | 1a    | 1    | 1      | 1.2041(17) | 0.7579(9)  | 0.4765(14) |                     |
| H12A |     | 1a    | 1    | 1      | 1.11210    | 0.77550    | 0.44040    | 0.1440              |
| H12B |     | 1a    | 1    | 1      | 1.28830    | 0.81300    | 0.43680    | 0.1440              |
| H12C |     | 1a    | 1    | 1      | 1.17870    | 0.75680    | 0.54940    | 0.1440              |
| C13  |     | 1a    | 1    | 1      | 1.2777(9)  | 0.3975(6)  | 0.6708(7)  |                     |
| C14  |     | 1a    | 1    | 1      | 1.1101(9)  | 0.0382(7)  | 0.9470(6)  |                     |
| C15  |     | 1a    | 1    | 1      | 1.0992(9)  | 0.1158(7)  | 0.9959(7)  |                     |
| H15  |     | 1a    | 1    | 1      | 1.09190    | 0.19040    | 0.95340    | 0.0450              |
| C16  |     | 1a    | 1    | 1      | 1.0990(12) | 0.0844(8)  | 1.1067(7)  |                     |
| H16  |     | 1a    | 1    | 1      | 1.08530    | 0.13700    | 1.13900    | 0.0640              |
| C17  |     | 1a    | 1    | 1      | 1.1193(15) | -0.0256(9) | 1.1698(7)  |                     |

|      |    |   |            |             |            |        |
|------|----|---|------------|-------------|------------|--------|
| H17  | 1a | 1 | 1.12770    | -0.04620    | 1.24350    | 0.0780 |
| C18  | 1a | 1 | 1.1267(13) | -0.1025(8)  | 1.1235(7)  |        |
| H18  | 1a | 1 | 1.12980    | -0.17700    | 1.16780    | 0.0630 |
| C19  | 1a | 1 | 1.130(1)   | -0.0741(7)  | 1.0107(7)  |        |
| C20  | 1a | 1 | 1.1409(11) | -0.1633(7)  | 0.9654(7)  |        |
| H20A | 1a | 1 | 1.14230    | -0.23540    | 1.02350    | 0.0480 |
| H20B | 1a | 1 | 1.23740    | -0.15150    | 0.91360    | 0.0480 |
| C21  | 1a | 1 | 0.969(1)   | -0.2564(6)  | 0.8769(7)  |        |
| H21  | 1a | 1 | 1.06890    | -0.26840    | 0.83750    | 0.0430 |
| C22  | 1a | 1 | 0.9180(11) | -0.3651(7)  | 0.9730(7)  |        |
| H22A | 1a | 1 | 0.97640    | -0.36800    | 1.03150    | 0.0520 |
| H22B | 1a | 1 | 0.80650    | -0.36230    | 0.99900    | 0.0520 |
| C23  | 1a | 1 | 0.939(2)   | -0.4701(9)  | 0.9543(10) |        |
| C24  | 1a | 1 | 0.9934(16) | -0.4815(11) | 0.8635(11) |        |
| H24A | 1a | 1 | 1.02460    | -0.41900    | 0.80070    | 0.0910 |
| H24B | 1a | 1 | 1.00140    | -0.55220    | 0.86110    | 0.0910 |
| C25  | 1a | 1 | 0.922(2)   | -0.5651(11) | 1.0628(13) |        |
| H25A | 1a | 1 | 0.88440    | -0.63130    | 1.05500    | 0.1450 |
| H25B | 1a | 1 | 0.84680    | -0.54790    | 1.11460    | 0.1450 |
| H25C | 1a | 1 | 1.02260    | -0.57680    | 1.08830    | 0.1450 |
| C26  | 1a | 1 | 0.8528(9)  | -0.2121(6)  | 0.7925(6)  |        |
| C27  | 1a | 1 | 0.4513(10) | 0.5389(7)   | 0.9424(7)  |        |
| C28  | 1a | 1 | 0.4740(11) | 0.6208(8)   | 0.9849(7)  |        |
| H28  | 1a | 1 | 0.49620    | 0.69440     | 0.93770    | 0.0530 |
| C29  | 1a | 1 | 0.4638(14) | 0.5938(10)  | 1.0953(9)  |        |
| H29  | 1a | 1 | 0.47200    | 0.65010     | 1.12230    | 0.0790 |
| C30  | 1a | 1 | 0.4416(16) | 0.4849(10)  | 1.1667(8)  |        |
| H30  | 1a | 1 | 0.44460    | 0.46610     | 1.24090    | 0.0840 |
| C31  | 1a | 1 | 0.4147(13) | 0.4045(9)   | 1.1255(8)  |        |
| H31  | 1a | 1 | 0.39520    | 0.33120     | 1.17410    | 0.0700 |
| C32  | 1a | 1 | 0.4152(10) | 0.4274(7)   | 1.0135(7)  |        |
| C33  | 1a | 1 | 0.3639(10) | 0.3388(7)   | 0.9744(7)  |        |
| H33A | 1a | 1 | 0.34750    | 0.26850     | 1.03610    | 0.0480 |
| H33B | 1a | 1 | 0.26280    | 0.35720     | 0.94850    | 0.0480 |
| C34  | 1a | 1 | 0.6039(10) | 0.2500(7)   | 0.9229(8)  |        |
| H34  | 1a | 1 | 0.63460    | 0.26350     | 0.98540    | 0.0590 |
| C35  | 1a | 1 | 0.5466(12) | 0.1279(8)   | 0.9648(10) |        |
| H35A | 1a | 1 | 0.54820    | 0.10520     | 0.90300    | 0.0680 |
| H35B | 1a | 1 | 0.43740    | 0.12040     | 1.00010    | 0.0680 |
| C36  | 1a | 1 | 0.6477(14) | 0.0474(10)  | 1.0475(12) |        |
| H36  | 1a | 1 | 0.76100    | 0.06810     | 1.02210    | 0.1010 |
| C37  | 1a | 1 | 0.6070(19) | -0.0738(10) | 1.0456(16) |        |
| H37A | 1a | 1 | 0.51620    | -0.10870    | 1.09920    | 0.1840 |
| H37B | 1a | 1 | 0.69630    | -0.11910    | 1.06190    | 0.1840 |
| H37C | 1a | 1 | 0.58440    | -0.06560    | 0.97450    | 0.1840 |
| C38  | 1a | 1 | 0.598(2)   | 0.0604(15)  | 1.1591(11) |        |
| H38A | 1a | 1 | 0.54520    | 0.12840     | 1.14750    | 0.1700 |

|      |    |   |            |             |            |        |
|------|----|---|------------|-------------|------------|--------|
| H38B | 1a | 1 | 0.69110    | 0.06230     | 1.19200    | 0.1700 |
| H38C | 1a | 1 | 0.52790    | -0.00140    | 1.20660    | 0.1700 |
| C39  | 1a | 1 | 0.7455(8)  | 0.2848(6)   | 0.8352(7)  |        |
| C40  | 1a | 1 | 0.6911(9)  | 0.6321(6)   | 0.5445(6)  |        |
| C41  | 1a | 1 | 0.6915(10) | 0.5537(7)   | 0.4996(7)  |        |
| H41  | 1a | 1 | 0.66040    | 0.48060     | 0.54470    | 0.0490 |
| C42  | 1a | 1 | 0.7374(12) | 0.5792(8)   | 0.3867(7)  |        |
| H42  | 1a | 1 | 0.73680    | 0.52370     | 0.35800    | 0.0620 |
| C43  | 1a | 1 | 0.7836(12) | 0.6889(9)   | 0.3189(7)  |        |
| H43  | 1a | 1 | 0.81510    | 0.70770     | 0.24430    | 0.0670 |
| C44  | 1a | 1 | 0.7820(11) | 0.7677(8)   | 0.3634(7)  |        |
| H44  | 1a | 1 | 0.81220    | 0.84070     | 0.31760    | 0.0600 |
| C45  | 1a | 1 | 0.7362(9)  | 0.7441(6)   | 0.4770(7)  |        |
| C46  | 1a | 1 | 0.7293(10) | 0.8347(7)   | 0.5211(7)  |        |
| H46A | 1a | 1 | 0.80500    | 0.82330     | 0.57180    | 0.0460 |
| H46B | 1a | 1 | 0.75640    | 0.90600     | 0.46190    | 0.0460 |
| C47  | 1a | 1 | 0.5285(10) | 0.9326(7)   | 0.6093(7)  |        |
| H47  | 1a | 1 | 0.61350    | 0.94530     | 0.64670    | 0.0470 |
| C48  | 1a | 1 | 0.5140(11) | 1.0418(7)   | 0.5110(8)  |        |
| H48A | 1a | 1 | 0.58990    | 1.04330     | 0.44900    | 0.0540 |
| H48B | 1a | 1 | 0.40870    | 1.04190     | 0.49120    | 0.0540 |
| C49  | 1a | 1 | 0.5426(19) | 1.1459(8)   | 0.5338(11) |        |
| C50  | 1a | 1 | 0.5425(16) | 1.1593(10)  | 0.6291(12) |        |
| H50A | 1a | 1 | 0.52250    | 1.09830     | 0.69450    | 0.1000 |
| H50B | 1a | 1 | 0.56240    | 1.22970     | 0.62960    | 0.1000 |
| C51  | 1a | 1 | 0.568(2)   | 1.2450(11)  | 0.4226(14) |        |
| H51A | 1a | 1 | 0.46910    | 1.25880     | 0.39410    | 0.1640 |
| H51B | 1a | 1 | 0.64490    | 1.22760     | 0.37230    | 0.1640 |
| H51C | 1a | 1 | 0.60490    | 1.31010     | 0.43260    | 0.1640 |
| C52  | 1a | 1 | 0.3763(9)  | 0.8957(7)   | 0.6929(7)  |        |
| Cu1  | 1a | 1 | 1.07268(9) | 0.21347(7)  | 0.73208(7) |        |
| Cu2  | 1a | 1 | 1.0169(1)  | -0.02538(7) | 0.77321(7) |        |
| Cu3  | 1a | 1 | 0.56479(9) | 0.46393(7)  | 0.76540(7) |        |
| Cu4  | 1a | 1 | 0.52783(9) | 0.70381(7)  | 0.71490(7) |        |
| N1   | 1a | 1 | 1.0318(8)  | 0.3548(5)   | 0.6181(5)  |        |
| H1   | 1a | 1 | 0.95280    | 0.38900     | 0.65510    | 0.0370 |
| N2   | 1a | 1 | 1.0000(8)  | -0.1588(6)  | 0.9102(6)  |        |
| H2A  | 1a | 1 | 0.90630    | -0.15330    | 0.95930    | 0.0400 |
| N3   | 1a | 1 | 0.4773(8)  | 0.3237(6)   | 0.8860(6)  |        |
| H3A  | 1a | 1 | 0.41420    | 0.28600     | 0.85210    | 0.0430 |
| N4   | 1a | 1 | 0.5689(8)  | 0.8338(5)   | 0.5770(6)  |        |
| H4A  | 1a | 1 | 0.49360    | 0.82810     | 0.52970    | 0.0420 |
| O1   | 1a | 1 | 0.9930(7)  | 0.1178(4)   | 0.6605(4)  |        |
| O2   | 1a | 1 | 1.3906(8)  | 0.4591(6)   | 0.6616(6)  |        |
| O3   | 1a | 1 | 1.2413(7)  | 0.3034(4)   | 0.7518(4)  |        |
| O4   | 1a | 1 | 1.1106(7)  | 0.0696(4)   | 0.8380(4)  |        |
| O5   | 1a | 1 | 0.7507(7)  | -0.2770(5)  | 0.7885(5)  |        |

|     |    |   |           |            |           |
|-----|----|---|-----------|------------|-----------|
| O6  | 1a | 1 | 0.8745(8) | -0.1102(5) | 0.7291(5) |
| O7  | 1a | 1 | 0.4578(7) | 0.5618(5)  | 0.8350(4) |
| O8  | 1a | 1 | 0.8547(7) | 0.2166(5)  | 0.8388(5) |
| O9  | 1a | 1 | 0.7408(7) | 0.3715(4)  | 0.7512(4) |
| O10 | 1a | 1 | 0.6474(7) | 0.6073(4)  | 0.6504(4) |
| O11 | 1a | 1 | 0.2697(7) | 0.9572(5)  | 0.6939(5) |
| O12 | 1a | 1 | 0.3662(7) | 0.7907(5)  | 0.7553(6) |

#### S4. Synthesis of H<sub>2</sub>L ligand, N-(2-hydroxybenzyl)-L-leucine

The ligand [N-(2-hydroxybenzyl)-L-leucine], [H<sub>2</sub>L)] was synthesized according to the literature,<sup>1</sup> with minor modifications. Typically, salicylaldehyde (1.20 g, 10 mmol) in ethanol (10 mL) was added to a solution of L-leucine (0.1312g, 10 mmol) in water (30 mL) containing KOH (0.56 g, 10 mmol). The yellow solution was stirred for 30 min at room temperature, and then cooled in an ice bath. An excess of sodium borohydride (0.46 g, 12 mmol) in water (5 mL) was added to the mixture formed Schiff base intermediate. The yellow color slowly discharged after 10 min. The solution was acidified with hydrobromic acid to a pH of 3.5-5.0. The resulting solid was filtered off, washed with ethanol, and recrystallized from water/ethanol (1:1) and dried to give the final product (70% yield) as a white powder. Elemental analysis for C<sub>13</sub>H<sub>19</sub>N<sub>2</sub>O<sub>3</sub> Calcd: C, 62.13%; H, 7.62%; N, 11.15%. Found: C, 62.05%; H, 7.70%; N, 11.20%.

#### S5. Synthesis of homochiral (Cu<sub>4</sub>L<sub>4</sub>)<sub>n</sub>

For synthesis of (Cu<sub>4</sub>L<sub>4</sub>)<sub>n</sub> suitable for single crystal X-ray diffraction, ligand H<sub>2</sub>L (7.5 mg, 0.0316 mmol) was dissolved in a mixture of LiOH aqueous solution (0.75mL, 0.1mol L<sup>-1</sup>), EtOH (1mL) and acetonitrile (1mL). CuCl<sub>2</sub>·2H<sub>2</sub>O aqueous solution (0.3mL, 0.1mol L<sup>-1</sup>) was added into the H<sub>2</sub>L solution, then the mixture was sealed in a 10 mL of a vial at room temperature. Flaky crystals of (Cu<sub>4</sub>L<sub>4</sub>)<sub>n</sub> were obtained after 2 days.

For rapid synthesis of (Cu<sub>4</sub>L<sub>4</sub>)<sub>n</sub> nanocrystals, ligand H<sub>2</sub>L (11.8mg, 0.05 mmol) was dissolved in LiOH aqueous solution (0.5mL, 0.0126g mL<sup>-1</sup>), DMF (0.5mL) and DMSO (0.25mL). Cu(OAc)<sub>2</sub> (0.0100g) was added into H<sub>2</sub>L solution under room temperature. The mixture turned turbid immediately, and after 2 min, the crystals were isolated by centrifugation, washed with water, and dried in a high yield (75%). Elemental analysis for Cu<sub>4</sub>C<sub>52</sub>H<sub>68</sub>N<sub>4</sub>O<sub>12</sub> (%) Calcd: C, 52.25%; H, 5.73%; N, 4.69%. Found: C, 53.11%; H, 5.68%; N, 4.75%.

The enantiomer of  $(\text{Cu}_4\text{L}_4)_n$ , homochiral  $(\text{Cu}_4\text{L}_4)_n'$  was synthesized exactly as  $(\text{Cu}_4\text{L}_4)_n$ , except *d*-HL was used instead of *l*-HL. The ligand, *d*-HL was synthesized as *l*-HL as above, except D-leucine was used instead of L-leucine. Elemental analysis for  $\text{Cu}_4\text{C}_{52}\text{H}_{68}\text{N}_4\text{O}_{12}$  (%) Calcd: C, 52.25%; H, 5.73%; N, 4.69%. Found: C, 53.49%; H, 5.69%; N, 4.74%.

#### **S6. Fabrication and measurements of chiral sensor**

Glassy carbon electrodes (GCE,  $\Phi = 4$  mm) was carefully polished with 0.1  $\mu\text{m}$  and 0.05  $\mu\text{m}$  alumina slurry to obtain a mirror-like surface. After this, GCE washed ultrasonically with ultrapure water, nitric acid (1:1, v/v), sodium hydroxide ( $0.1 \text{ mol}\cdot\text{cm}^{-3}$ ) and ethanol, respectively, and dried in air at room temperature.

A suspension containing 3.0 mg of  $(\text{Cu}_4\text{L}_4)_n$ , 250  $\mu\text{L}$  of water, 750  $\mu\text{L}$  of ethanol and 30  $\mu\text{L}$  of Naifion was sonicated for 15 min at room temperature. Electrode modification was performed by dropping 7  $\mu\text{L}$  of this solution on the surface of glassy-carbon electrode (GCE), which was dried in the air for 12 h at room temperature.

All electrochemical experiments were implemented with three electrode system. The bare or the modified GCE (4 mm in diameter), a platinum wire and a saturated calomel electrode (SCE) were used as working electrode, the counter electrode and the reference electrode, respectively. All measurements were conducted at room temperature ( $25 \pm 2$  °C).

#### **References**

1. J. D. Ranford, J. J. Vittal, D. Wu, and X. Yang, *Angew. Chem. Int. Ed.*, 1999, **38**, 3498.
